# Supplementary material
Source: PubMed Central journal article supplement (PMC5233726)
Supplement: NIHMS840085-supplement-Supplemental.pdf [file NIHMS840085-supplement-Supplemental.pdf]

*Supporting Information for :*

**Light-Responsive Biodegradable Nanomedicine Overcomes  
Multidrug Resistance *via* NO-Enhanced Chemosensitization**

Jing Fan,<sup>†,‡,§</sup> Qianjun He,<sup>‡</sup> Yi Liu,<sup>‡</sup> Fuwu Zhang,<sup>‡</sup> Xiangyu Yang,<sup>†,‡</sup> Zhe Wang,<sup>‡</sup> Nan Lu,<sup>‡</sup> Wenpei Fan,<sup>‡,‡</sup> Lisen Lin,<sup>‡</sup> Gang Niu,<sup>‡</sup> Nongyue He,<sup>\*,†</sup> Jibin Song,<sup>\*,‡</sup> and Xiaoyuan Chen<sup>\*,‡</sup>

<sup>†</sup>State Key Laboratory of Bioelectronics, Southeast University, Nanjing 210096, Jiangsu, P.R. China

<sup>‡</sup>Laboratory of Molecular Imaging and Nanomedicine (LOMIN), National Institute of Biomedical Imaging and Bioengineering (NIBIB), National Institutes of Health, Bethesda, Maryland 20892, United States

<sup>‡</sup>Guangdong Key Laboratory for Biomedical Measurements and Ultrasound Imaging, Department of Biomedical Engineering, School of Medicine, Shenzhen University, Shenzhen, 518060 Guangdong, P.R. China

<sup>§</sup>Biological Target Diagnosis & treatment Center, Guangxi Medical University, Nanning 530021, Guangxi, P.R. China

\*Corresponding authors.

E-mail: [nyhe1958@163.com](mailto:nyhe1958@163.com); [jibin.song@nih.gov](mailto:jibin.song@nih.gov); [shawn.chen@nih.gov](mailto:shawn.chen@nih.gov).

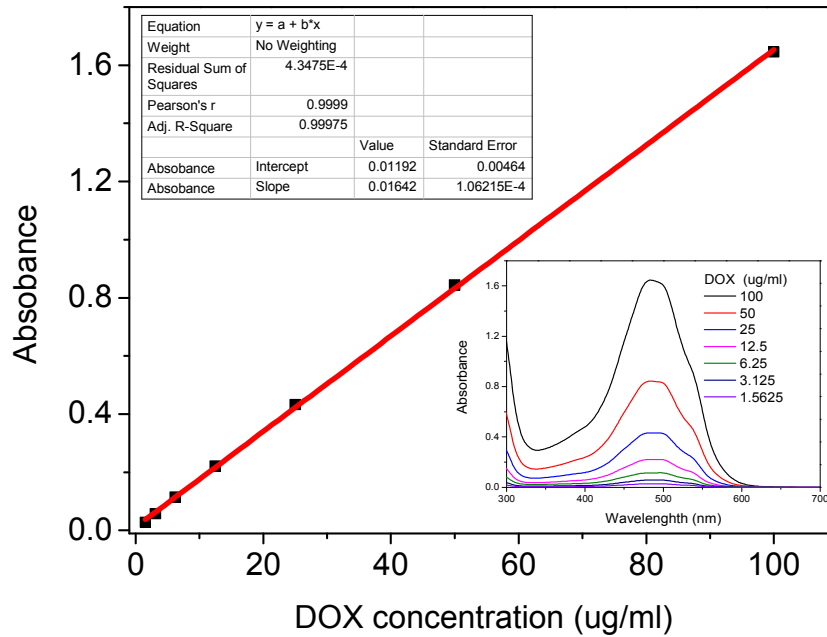

**Fig. S1** DOX standard curve. Different concentrations of doxorubicin (from 1.56 to 100  $\mu\text{g}/\text{mL}$ ) in pH 7.4 PBS were detected by UV-Vis to establish a standard curve.

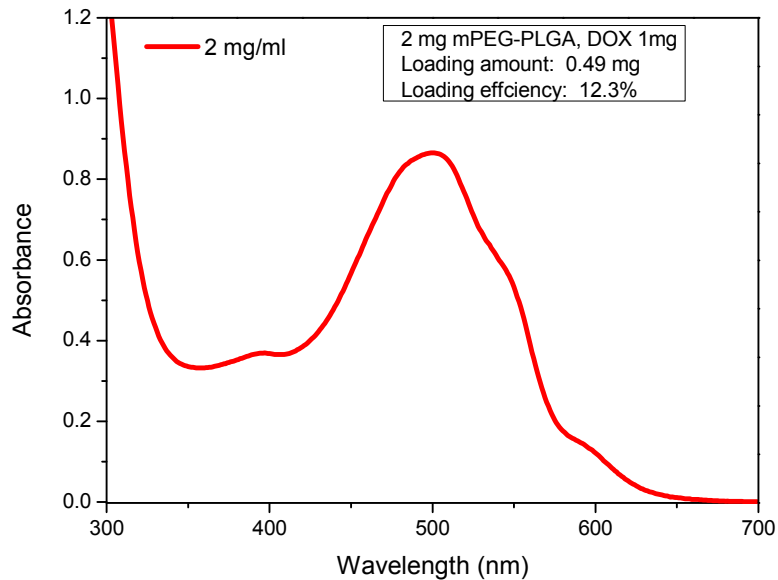

**Fig. S2** UV-Vis spectrum of mPEG-PLGA-BNN6-DOX. The supernatant was collected and measured to calculate the loading amount and efficiency of DOX.

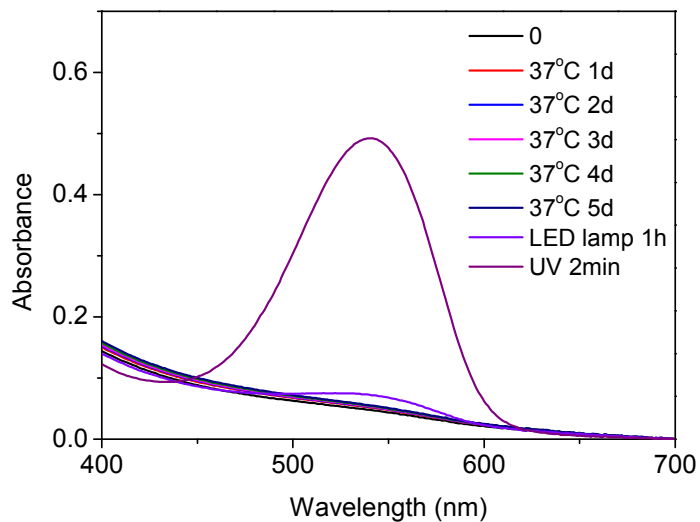

**Fig. S3** Griess assay detection of the NO release of mPEG-PLGA-BNN6: PBS solution at 37 °C dark environment for up to 5 days, 365 nm UV irradiation for 2 min, or LED lamp irradiation for 1 h.

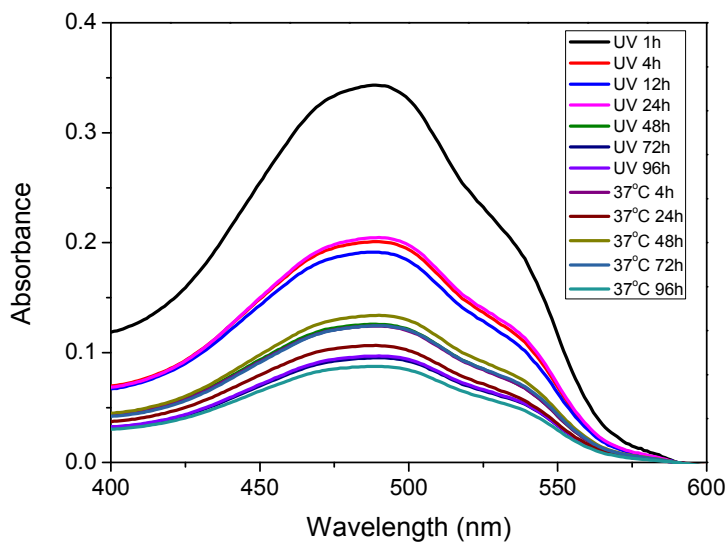

**Fig. S4** UV-Vis monitoring of DOX release from mPEG-PLGA-BNN6-DOX after 2 min UV irradiation or just incubation at 37 °C in the dark for 96 h.

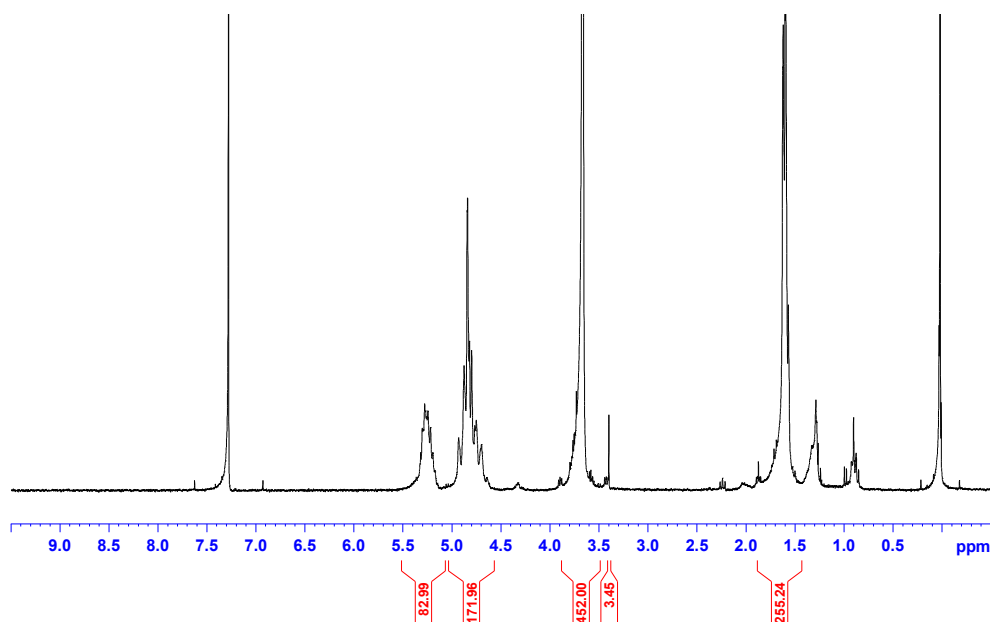

**Fig. S5**  $^1\text{H}$  NMR spectrum of mPEG-PLGA copolymer: 3.72 ( $-\text{O}-\text{CH}_2\text{CH}_2-$ ), 1.61 ( $-\text{CH}_3$ ), 4.82 ( $-\text{CO}-\text{CH}-\text{O}$ ), 5.28 ( $-\text{CO}-\text{CH}_2-\text{O}-$ ).

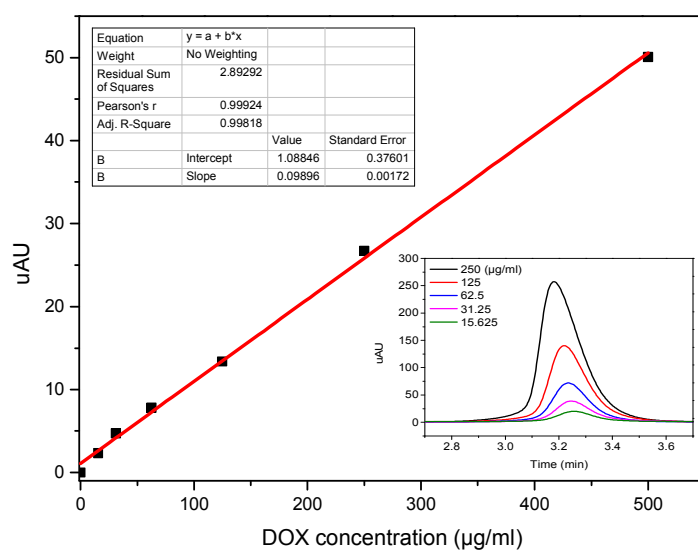

**Fig. S6** DOX standard curve by HPLC. Different concentrations of doxorubicin (from 250 to 0  $\mu\text{g}/\text{mL}$ ) in acetonitrile/ $\text{H}_2\text{O}$  (1/1) solution were detected by HPLC to establish a standard curve.
